# Supplementary material
Source: PubMed Central journal article supplement (PMC3946884)
Supplement: NIHMS529909-supplement-supplement_1.pdf [file NIHMS529909-supplement-supplement_1.pdf]

**Supplementary Table (online only).** International Classification of Diseases, Ninth Revision (*ICD-9*) and current procedural terminology (*CPT*) diagnosis and procedure codes

| <i>ICD-9 diagnosis code</i>        | <i>Description</i>                                                                                                                   |
|------------------------------------|--------------------------------------------------------------------------------------------------------------------------------------|
| Atherosclerosis of the extremities |                                                                                                                                      |
| 440.20                             | Atherosclerosis of the extremities, unspecified                                                                                      |
| 440.21                             | Atherosclerosis of the extremities with intermittent claudication                                                                    |
| 440.22                             | Atherosclerosis of the extremities with rest pain                                                                                    |
| 440.23                             | Atherosclerosis of the extremities with ulceration                                                                                   |
| 440.24                             | Atherosclerosis of the extremities with gangrene                                                                                     |
| 440.29                             | Atherosclerosis, other                                                                                                               |
| 440.30                             | Atherosclerosis of unspecified graft of the extremities                                                                              |
| 440.31                             | Atherosclerosis of autologous vein bypass graft of the extremities                                                                   |
| 440.32                             | Atherosclerosis of nonautologous vein bypass graft of the extremities                                                                |
| 443.9                              | Peripheral vascular disease, unspecified (intermittent claudication NOS, peripheral angiopathy NOS, peripheral vascular disease NOS) |
| Intermittent claudication          |                                                                                                                                      |
| 440.21                             | Atherosclerosis of the extremities with intermittent claudication                                                                    |
| CLI                                |                                                                                                                                      |
| 730.05                             | Acute osteomyelitis of pelvic region and thigh                                                                                       |
| 730.06                             | Acute osteomyelitis of lower leg                                                                                                     |
| 730.07                             | Acute osteomyelitis of ankle and foot                                                                                                |
| 730.09                             | Acute osteomyelitis of multiple sites                                                                                                |
| 444.22                             | Arterial embolism and thrombosis of lower extremity                                                                                  |
| 444.81                             | Arterial embolism and thrombosis of iliac artery                                                                                     |
| 440.22                             | Atherosclerosis of the extremities with rest pain                                                                                    |
| 440.23                             | Atherosclerosis of the extremities with ulceration                                                                                   |
| 440.24                             | Atherosclerosis of the extremities with gangrene                                                                                     |
| 682.6                              | Cellulitis of leg, except foot                                                                                                       |
| 682.7                              | Cellulitis of foot, except toes                                                                                                      |
| 681.1                              | Cellulitis of toe                                                                                                                    |
| 730.15                             | Chronic osteomyelitis of pelvic region and thigh                                                                                     |
| 730.16                             | Chronic osteomyelitis of lower leg                                                                                                   |
| 730.17                             | Chronic osteomyelitis of ankle and foot                                                                                              |
| 730.19                             | Chronic osteomyelitis of multiple sites                                                                                              |
| 707.10                             | Chronic ulcer of lower limb, unspecified                                                                                             |
| 707.11                             | Chronic ulcer of thigh                                                                                                               |
| 707.12                             | Chronic ulcer of calf                                                                                                                |
| 707.13                             | Chronic ulcer of ankle                                                                                                               |
| 707.14                             | Chronic ulcer of heel and midfoot                                                                                                    |
| 707.15                             | Chronic ulcer of other part of foot (toes)                                                                                           |
| 707.19                             | Chronic ulcer of other part of lower limb                                                                                            |
| 785.4                              | Gangrene                                                                                                                             |
| 040.0                              | Gas gangrene                                                                                                                         |
| 730.25                             | Unspecified osteomyelitis of pelvic region and thigh                                                                                 |
| 730.26                             | Unspecified osteomyelitis of lower leg                                                                                               |
| 730.27                             | Unspecified osteomyelitis of ankle and foot                                                                                          |
| 730.29                             | Unspecified osteomyelitis of multiple sites                                                                                          |
| Endovascular revascularization     |                                                                                                                                      |
| 39.50                              | Angioplasty or atherectomy of other noncoronary vessel(s)                                                                            |
| 39.90                              | Insertion of noncoronary stent(s) or stent graft(s)                                                                                  |
| Open revascularization             |                                                                                                                                      |
| 39.25                              | Aorta-iliac-femoral bypass                                                                                                           |
| 38.18                              | Endarterectomy of lower limb artery                                                                                                  |
| 39.29                              | Other (peripheral) vascular shunt or bypass                                                                                          |
| Major amputation                   |                                                                                                                                      |
| 84.15                              | Amputation below knee                                                                                                                |
| 84.17                              | Amputation above knee                                                                                                                |

*(Continued on next page)*

**Supplementary Table (online only).** Continued.

| <i>CPT procedure code</i>      | <i>Description</i>                                                                                                                                                                                                                                                                                                                                   |
|--------------------------------|------------------------------------------------------------------------------------------------------------------------------------------------------------------------------------------------------------------------------------------------------------------------------------------------------------------------------------------------------|
| Endovascular revascularization |                                                                                                                                                                                                                                                                                                                                                      |
| 35470                          | Transluminal balloon angioplasty, percutaneous; tibioperoneal trunk or branches, each vessel                                                                                                                                                                                                                                                         |
| 35473                          | Transluminal balloon angioplasty, percutaneous; iliac                                                                                                                                                                                                                                                                                                |
| 35474                          | Transluminal balloon angioplasty, percutaneous; femoral-popliteal                                                                                                                                                                                                                                                                                    |
| 75962                          | Transluminal balloon angioplasty; peripheral artery, radiological supervision and interpretation                                                                                                                                                                                                                                                     |
| 75964                          | Transluminal balloon angioplasty, each additional peripheral artery, radiological supervision and interpretation                                                                                                                                                                                                                                     |
| 35492                          | Transluminal peripheral atherectomy, percutaneous; iliac                                                                                                                                                                                                                                                                                             |
| 35493                          | Transluminal peripheral atherectomy, percutaneous; femoral-popliteal                                                                                                                                                                                                                                                                                 |
| 35495                          | Transluminal peripheral atherectomy, percutaneous; tibioperoneal trunk and branches                                                                                                                                                                                                                                                                  |
| 75992                          | Transluminal atherectomy, peripheral artery, radiological supervision and interpretation                                                                                                                                                                                                                                                             |
| 75993                          | Transluminal atherectomy, each additional peripheral artery, radiological supervision and interpretation                                                                                                                                                                                                                                             |
| 37184                          | Primary percutaneous transluminal mechanical thrombectomy, noncoronary, arterial or arterial bypass graft, including fluoroscopic guidance and intraprocedural pharmacological thrombolytic injection(s); initial vessel                                                                                                                             |
| 37185                          | Primary percutaneous transluminal mechanical thrombectomy, noncoronary, arterial or arterial bypass graft, including fluoroscopic guidance and intraprocedural pharmacological thrombolytic injection(s); second and all subsequent vessel(s) within the same vascular family                                                                        |
| 37186                          | Secondary percutaneous transluminal thrombectomy (eg, nonprimary mechanical, snare basket, suction technique), noncoronary, arterial or bypass graft, including fluoroscopic guidance and intraprocedural pharmacological thrombolytic injections, provided in conjunction with percutaneous intervention other than primary mechanical thrombectomy |
| 37187                          | Percutaneous transluminal mechanical thrombectomy, vein(s), including intraprocedural pharmacological thrombolytic injections and fluoroscopic guidance                                                                                                                                                                                              |
| 37188                          | Percutaneous transluminal mechanical thrombectomy, vein(s), including intraprocedural pharmacological thrombolytic injections and fluoroscopic guidance, repeat treatment on subsequent day during course of thrombolytic therapy                                                                                                                    |
| 37205                          | Transcatheter placement of an intravascular stent(s) (except coronary, carotid, and vertebral), percutaneous; initial vessel                                                                                                                                                                                                                         |
| 37206                          | Transcatheter placement of an intravascular stent(s), each additional vessel (except coronary, carotid, and vertebral), percutaneous; initial vessel                                                                                                                                                                                                 |
| 75960                          | Transcatheter introduction of intravascular stent(s) (except coronary, carotid, and vertebral vessel), percutaneous and/or open, radiological supervision and interpretation, each vessel                                                                                                                                                            |
| Open revascularization         |                                                                                                                                                                                                                                                                                                                                                      |
| 35500                          | Harvest of upper extremity vein, one segment, for lower extremity bypass procedure                                                                                                                                                                                                                                                                   |
| 35521                          | Bypass graft, with vein; axillary-femoral                                                                                                                                                                                                                                                                                                            |
| 35533                          | Bypass graft, with vein; axillary-femoral-femoral                                                                                                                                                                                                                                                                                                    |
| 35541                          | Bypass graft, with vein; aortoiliac or bi-iliac                                                                                                                                                                                                                                                                                                      |
| 35546                          | Bypass graft, with vein; aortofemoral or bifemoral                                                                                                                                                                                                                                                                                                   |
| 35548                          | Bypass graft, with vein; aortoiliofemoral, unilateral                                                                                                                                                                                                                                                                                                |
| 35549                          | Bypass graft, with vein; aortoiliofemoral, bilateral                                                                                                                                                                                                                                                                                                 |
| 35551                          | Bypass graft, with vein; aortofemoral-popliteal                                                                                                                                                                                                                                                                                                      |
| 35556                          | Bypass graft, with vein; femoral-popliteal                                                                                                                                                                                                                                                                                                           |
| 35558                          | Bypass graft, with vein; femoral-femoral                                                                                                                                                                                                                                                                                                             |
| 35563                          | Bypass graft, with vein; ilioliac                                                                                                                                                                                                                                                                                                                    |
| 35565                          | Bypass graft, with vein; iliofemoral                                                                                                                                                                                                                                                                                                                 |
| 35566                          | Bypass graft, with vein; femoral-anterior tibial, posterior tibial, peroneal artery or other distal vessels                                                                                                                                                                                                                                          |
| 35571                          | Bypass graft, with vein; popliteal-tibial, -peroneal artery or other distal vessels                                                                                                                                                                                                                                                                  |
| 35583                          | In-situ vein bypass; femoral-popliteal                                                                                                                                                                                                                                                                                                               |
| 35585                          | In-situ vein bypass; femoral-anterior tibial, posterior tibial, or peroneal artery                                                                                                                                                                                                                                                                   |
| 35587                          | In-situ vein bypass; popliteal-tibial, peroneal                                                                                                                                                                                                                                                                                                      |
| 35621                          | Bypass graft, with other than vein; axillary-femoral                                                                                                                                                                                                                                                                                                 |
| 35623                          | Bypass graft, with other than vein; axillary-popliteal or -tibial                                                                                                                                                                                                                                                                                    |
| 35641                          | Bypass graft, with other than vein; aortoiliac or bi-iliac                                                                                                                                                                                                                                                                                           |
| 35646                          | Bypass graft, with other than vein; aortobifemoral                                                                                                                                                                                                                                                                                                   |
| 35647                          | Bypass graft, with other than vein; aortofemoral                                                                                                                                                                                                                                                                                                     |
| 35651                          | Bypass graft, with other than vein; aortofemoral-popliteal                                                                                                                                                                                                                                                                                           |
| 35654                          | Bypass graft, with other than vein; axillary-femoral-femoral                                                                                                                                                                                                                                                                                         |
| 35656                          | Bypass graft, with other than vein; femoral-popliteal                                                                                                                                                                                                                                                                                                |
| 35661                          | Bypass graft, with other than vein; femoral-femoral                                                                                                                                                                                                                                                                                                  |
| 35663                          | Bypass graft, with other than vein; ilioliac                                                                                                                                                                                                                                                                                                         |
| 35665                          | Bypass graft, with other than vein; iliofemoral                                                                                                                                                                                                                                                                                                      |
| 35666                          | Bypass graft, with other than vein; femoral-anterior tibial, posterior tibial, or peroneal artery                                                                                                                                                                                                                                                    |
| 35671                          | Bypass graft, with other than vein; popliteal-tibial or -peroneal artery                                                                                                                                                                                                                                                                             |
| 35681                          | Bypass graft, composite, prosthetic and vein                                                                                                                                                                                                                                                                                                         |
| 35682                          | Bypass graft, autogenous composite, two segments of veins from two locations                                                                                                                                                                                                                                                                         |
| 35683                          | Bypass graft, autogenous composite, three or more segments of vein from two or more locations                                                                                                                                                                                                                                                        |

**Supplementary Table (online only).** Continued.

| <i>CPT procedure code</i> | <i>Description</i>                                                                                                              |
|---------------------------|---------------------------------------------------------------------------------------------------------------------------------|
| 35685                     | Placement of vein patch or cuff at distal anastomosis of bypass graft, synthetic conduit                                        |
| 35686                     | Creation of distal arteriovenous fistula during lower extremity bypass surgery (nonhemodialysis)                                |
| 35700                     | Reoperation, femoral-popliteal or femoral (popliteal)-anterior tibial, posterior tibial, peroneal artery or other distal vessel |
| 35351                     | Thromboendarterectomy, with or without patch graft; iliac                                                                       |
| 35355                     | Thromboendarterectomy, with or without patch graft; iliofemoral                                                                 |
| 35361                     | Thromboendarterectomy, with or without patch graft; combined aortoiliac                                                         |
| 35363                     | Thromboendarterectomy, with or without patch graft; combined aortoiliofemoral                                                   |
| 35371                     | Thromboendarterectomy, with or without patch graft; common femoral                                                              |
| 35372                     | Thromboendarterectomy, with or without patch graft; deep (profunda) femoral                                                     |
| Major amputation          |                                                                                                                                 |
| 27590                     | Amputation, thigh, through femur, any level                                                                                     |
| 27591                     | Amputation, thigh, through femur, any level; with immediate fitting technique including first cast                              |
| 27592                     | Amputation, thigh, through femur, any level; open, circular (guillotine)                                                        |
| 27596                     | Amputation, thigh, through femur, any level; reamputation                                                                       |
| 27780                     | Amputation, leg, through tibia and fibula                                                                                       |
| 27781                     | Amputation, leg, through tibia and fibula; with immediate fitting technique including first cast                                |
| 27782                     | Amputation, leg, through tibia and fibula; open, circular (guillotine)                                                          |
| 27786                     | Amputation, leg, through tibia and fibula; reamputation                                                                         |

*CLI*, Critical limb ischemia.
